# Supplementary material for: NF1‐mutated melanoma tumors harbor distinct clinical and biological characteristics
Source: PubMed Central journal article supplement (PMC5527484; doi:10.1002/1878-0261.12050), 2017-03-24

***NF1* mutated melanoma tumors harbor clinical and biological characteristics**

Cirenajwis et al.

## SUPPLEMENTARY INFORMATION

### SUPPLEMENTARY TABLES

**Supplementary Table 1.** Clinical characteristics of 864 melanoma patients and their tumors.

|                              | <b>Whole cohort<br/>(N=864)</b> | <b>Hodis et al.<br/>(N=119)</b> | <b>Krauthammer et al.<br/>(N=119)</b> | <b>TCGA<br/>(N=464)</b> | <b>Lund<br/>(N=162)</b> |
|------------------------------|---------------------------------|---------------------------------|---------------------------------------|-------------------------|-------------------------|
| <i>Tumor type</i>            |                                 |                                 |                                       |                         |                         |
| Primary                      | 149 (0)                         | 15 (13)                         | 28 (24)                               | 100 (22)                | 6 (4)                   |
| Metastasis                   | 708 (0)                         | 103 (87)                        | 91 (76)                               | 362 (78)                | 152 (94)                |
| NA                           | 6 (1)                           | 1 (<1)                          | 0 (0)                                 | 2 (<1)                  | 4 (2)                   |
| <i>Melanoma origin</i>       |                                 |                                 |                                       |                         |                         |
| Cutaneous                    | 721 (83)                        | 93 (78)                         | 106 (89)                              | 429 (92)                | 93 (57)                 |
| Unknown primary              | 44 (5)                          | 10 (8)                          | 13 (11)                               | 0 (0)                   | 21 (13)                 |
| Non-sun induced <sup>1</sup> | 17 (2)                          | 7 (6)                           | 0 (0)                                 | 0 (0)                   | 10 (6)                  |
| Other <sup>2</sup>           | 4 (<1)                          | 1 (<1)                          | 0 (0)                                 | 0 (0)                   | 3 (2)                   |
| NA                           | 78 (9)                          | 8 (7)                           | 0 (0)                                 | 35 (8)                  | 35 (22)                 |
| <i>Gender</i>                |                                 |                                 |                                       |                         |                         |
| Female                       | 337 (39)                        | 53 (45)                         | 43 (36)                               | 179 (39)                | 62 (38)                 |
| Male                         | 527 (61)                        | 66 (55)                         | 76 (64)                               | 285 (61)                | 100 (62)                |
| <i>Age, mean (range)</i>     | 61 (17-94)                      | 52 (17-87)                      | 68 (41-94)                            | 61 (20-90)              | 63 (25-90)              |

<sup>1</sup> Including mucosal and acral lentiginous melanomas.

<sup>2</sup> Including uveal and tumors from other anatomical sites.

**Supplementary Table 4.** Thirty-six putative driver genes in the *NF1* genomic subtype.

| Gene    | BRAF.hot<br>n <sup>mut</sup> (%) | NF1.any<br>n <sup>mut</sup> (%) | RAS.hot<br>n <sup>mut</sup> (%) | Triple-wt<br>n <sup>mut</sup> (%) | P-value* |
|---------|----------------------------------|---------------------------------|---------------------------------|-----------------------------------|----------|
| ABCB6   | 2 (0.5)                          | 5 (6.2)                         | 2 (0.8)                         | 0 (0)                             | 0.047    |
| ABHD12B | 2 (0.5)                          | 9 (11.2)                        | 2 (0.8)                         | 1 (0.8)                           | 0.003    |
| CD44    | 4 (1)                            | 7 (8.8)                         | 2 (0.8)                         | 1 (0.8)                           | 0.009    |
| CUBN    | 32 (7.9)                         | 29 (36.2)                       | 20 (7.7)                        | 4 (3.3)                           | 0.005    |
| DLK1    | 5 (1.2)                          | 8 (10)                          | 4 (1.5)                         | 1 (0.8)                           | 0.044    |
| ELF5    | 4 (1)                            | 7 (8.8)                         | 4 (1.5)                         | 0 (0)                             | 0.030    |
| FBXO38  | 7 (1.7)                          | 10 (12.5)                       | 11 (4.2)                        | 1 (0.8)                           | 0.019    |
| GPRC5B  | 3 (0.7)                          | 6 (7.5)                         | 4 (1.5)                         | 0 (0)                             | 0.046    |
| HM13    | 1 (0.2)                          | 5 (6.2)                         | 2 (0.8)                         | 1 (0.8)                           | 0.027    |
| KRT76   | 13 (3.2)                         | 15 (18.8)                       | 9 (3.5)                         | 4 (3.3)                           | 0.047    |
| MAGEC2  | 15 (3.7)                         | 20 (25)                         | 14 (5.4)                        | 5 (4.1)                           | 0.034    |
| MAK     | 6 (1.5)                          | 13 (16.2)                       | 7 (2.7)                         | 2 (1.6)                           | 0.036    |
| MAPK13  | 3 (0.7)                          | 7 (8.8)                         | 5 (1.9)                         | 2 (1.6)                           | 0.030    |
| MKL1    | 4 (1)                            | 10 (12.5)                       | 8 (3.1)                         | 2 (1.6)                           | 0.044    |
| MMP14   | 1 (0.2)                          | 5 (6.2)                         | 2 (0.8)                         | 0 (0)                             | 0.030    |
| MMP27   | 12 (3)                           | 14 (17.5)                       | 7 (2.7)                         | 1 (0.8)                           | 0.016    |
| NRCAM   | 11 (2.7)                         | 15 (18.8)                       | 5 (1.9)                         | 2 (1.6)                           | 0.025    |
| NUDCD1  | 3 (0.7)                          | 7 (8.8)                         | 2 (0.8)                         | 0 (0)                             | 0.044    |
| OTOF    | 33 (8.2)                         | 27 (33.8)                       | 30 (11.5)                       | 5 (4.1)                           | 0.034    |
| PIK3R5  | 13 (3.2)                         | 14 (17.5)                       | 8 (3.1)                         | 2 (1.6)                           | 0.007    |
| PKNOX1  | 1 (0.2)                          | 7 (8.8)                         | 1 (0.4)                         | 0 (0)                             | 0.009    |
| PRKCB   | 16 (4)                           | 18 (22.5)                       | 13 (5)                          | 4 (3.3)                           | 0.003    |
| PTH2R   | 15 (3.7)                         | 14 (17.5)                       | 10 (3.8)                        | 0 (0)                             | 0.033    |
| PTPN11  | 4 (1)                            | 11 (13.8)                       | 5 (1.9)                         | 1 (0.8)                           | 0.001    |
| PTPRS   | 10 (2.5)                         | 18 (22.5)                       | 10 (3.8)                        | 3 (2.5)                           | 0.016    |
| RASA2   | 11 (2.7)                         | 18 (22.5)                       | 5 (1.9)                         | 3 (2.5)                           | 0.001    |
| RASSF2  | 4 (1)                            | 9 (11.2)                        | 3 (1.2)                         | 2 (1.6)                           | 0.009    |
| RNF213  | 23 (5.7)                         | 23 (28.7)                       | 16 (6.2)                        | 4 (3.3)                           | 0.030    |
| SMO     | 4 (1)                            | 10 (12.5)                       | 4 (1.5)                         | 2 (1.6)                           | 0.019    |
| SMYD3   | 2 (0.5)                          | 5 (6.2)                         | 2 (0.8)                         | 0 (0)                             | 0.027    |
| STAT4   | 18 (4.5)                         | 19 (23.8)                       | 8 (3.1)                         | 5 (4.1)                           | 0.040    |
| TET1    | 14 (3.5)                         | 22 (27.5)                       | 21 (8.1)                        | 6 (4.9)                           | 0.016    |
| TREM1   | 11 (2.7)                         | 8 (10)                          | 2 (0.8)                         | 0 (0)                             | 0.040    |
| TSC1    | 6 (1.5)                          | 11 (13.8)                       | 2 (0.8)                         | 2 (1.6)                           | 0.009    |
| WFDC1   | 1 (0.2)                          | 4 (5)                           | 2 (0.8)                         | 1 (0.8)                           | 0.048    |
| ZNF25   | 2 (0.5)                          | 8 (10)                          | 2 (0.8)                         | 0 (0)                             | 0.004    |

\* P values were obtained from a logistic regression model for mutational status (non-synonymous mutations) across the genomic subtypes while adjusting for mutational burden (non-coding and coding mutations). P-values have been corrected for multiple testing.

**Supplementary Table 5.** Recurrently mutated genes in *NF1*-mutated cases using MutSigCV. Top 10 genes of 1439 tested genes. Genes marked in red were also among the 36 genes found by logistic regression to be more frequently mutated in *NF1*-mutated cases.

| Gene   | Nonsilent mutations (n) | Silent mutations (n) | P        | q | Rank <i>NF1</i> mut | Rank <i>NF1</i> wt |
|--------|-------------------------|----------------------|----------|---|---------------------|--------------------|
| PTPN11 | 15                      | 0                    | 5.15E-03 | 1 | 1                   | 1021               |

|         |    |   |          |   |    |      |
|---------|----|---|----------|---|----|------|
| CDKN2A  | 19 | 2 | 3.87E-02 | 1 | 2  | 5    |
| GPRC5B  | 6  | 3 | 8.80E-02 | 1 | 3  | 1304 |
| GPR84   | 8  | 2 | 1.50E-01 | 1 | 4  | 17   |
| ITK     | 28 | 4 | 2.16E-01 | 1 | 5  | 1320 |
| RASSF2  | 9  | 1 | 2.23E-01 | 1 | 6  | 70   |
| PPP1R3C | 5  | 0 | 2.26E-01 | 1 | 7  | 147  |
| PTEN    | 6  | 0 | 2.40E-01 | 1 | 8  | 4    |
| ABHD12B | 9  | 2 | 2.41E-01 | 1 | 9  | 569  |
| NFIA    | 7  | 2 | 2.79E-01 | 1 | 10 | 220  |

## LEGENDS FOR SUPPLEMENTARY FIGURES

### Supplementary Figure 1

Five-year survival analysis of melanomas stratified by the mutational subtypes using the Kaplan-Meier estimator to determine (A) overall survival (OS) or (B) disease specific survival (DSS) in the “Lund” or “TCGA” datasets separately. Survival differences between the genomic groups were estimated using Kaplan-Meier analysis. P-values have been calculated using the log-rank test.

### Supplementary Figure 2

Five-year survival analysis of melanomas stratified by either hotspot mutations in *(N/H/K)RAS* alone or co-occurrence with non-synonymous mutations in *NF1* using the Kaplan-Meier estimator to determine (A) overall survival (OS) or (B) disease specific survival (DSS). Survival differences between the genomic groups were estimated using Kaplan-Meier analysis. P-values have been calculated using the log-rank test.

Supplementary Figure 1

A)

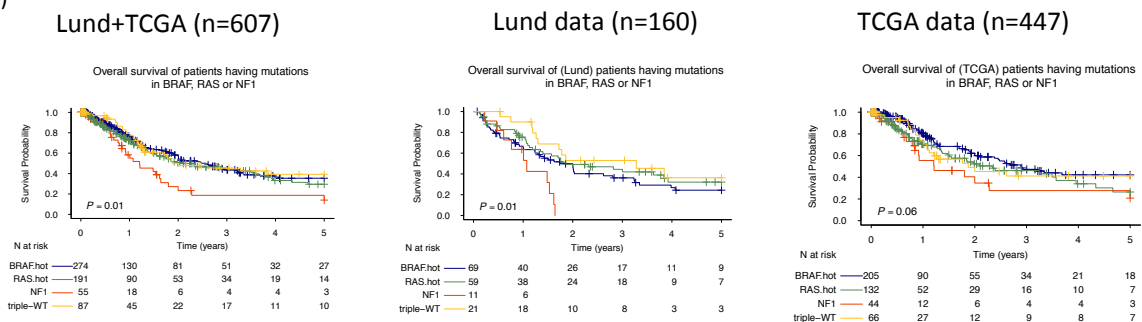

B)

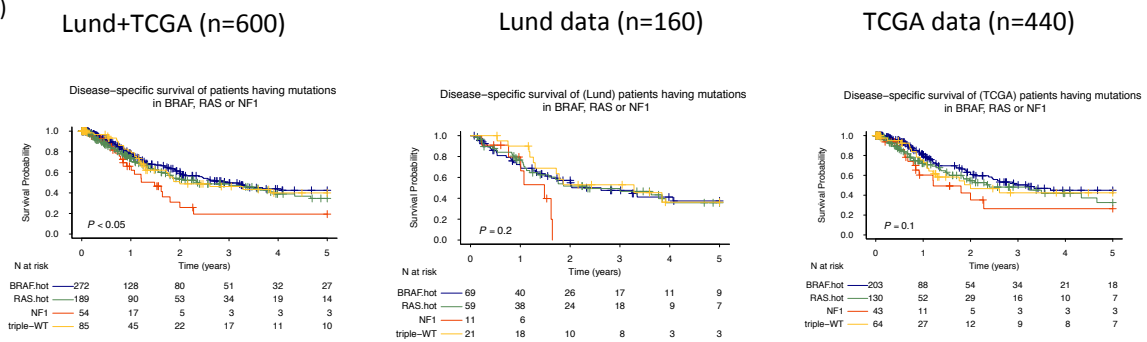

Supplementary Figure 2

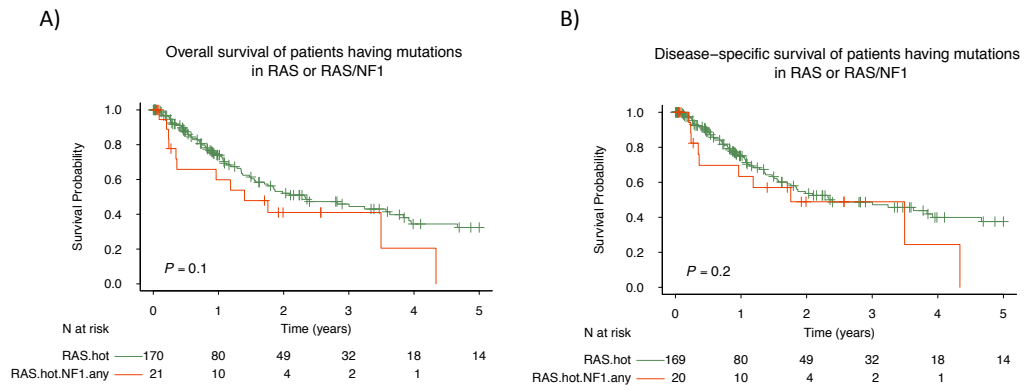

Supplement: MOL2-11-438-s001.pdf [file MOL2-11-438-s001.pdf]
